# Supplementary material
Source: Springer Nature journal article supplement (https://www.springermedizin.de/resource/supplementary/12936_2008_716_MOESM1_ESM.pdf/9548074)

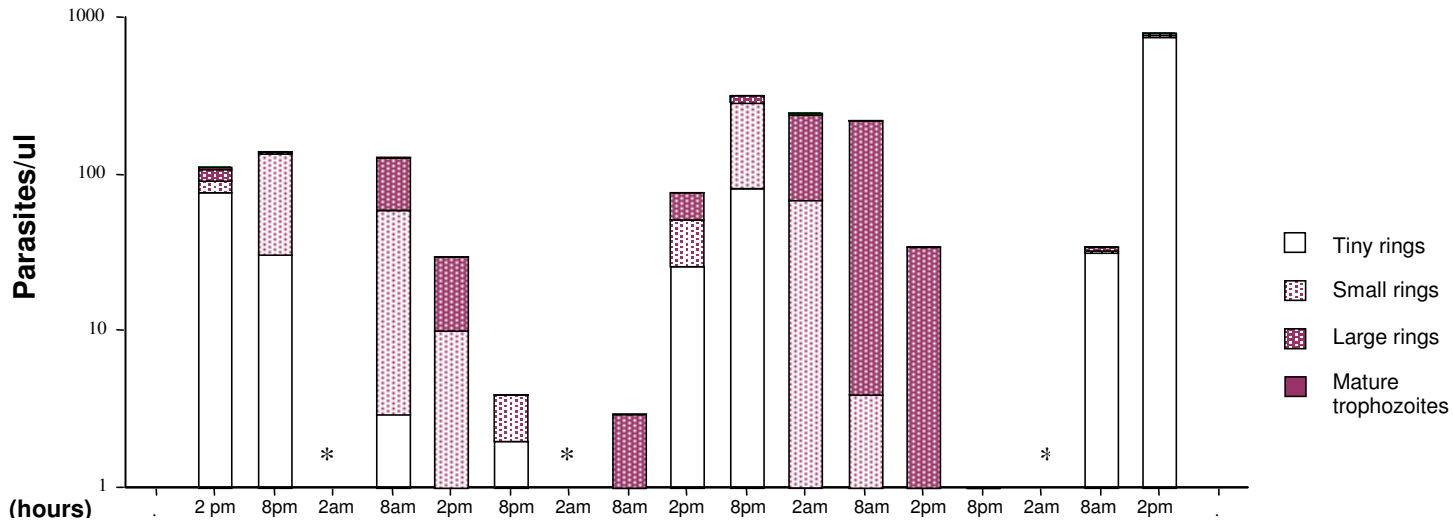

*msp 1*

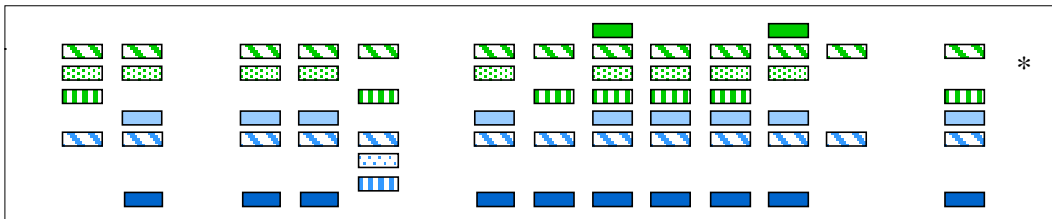

*msp 2*

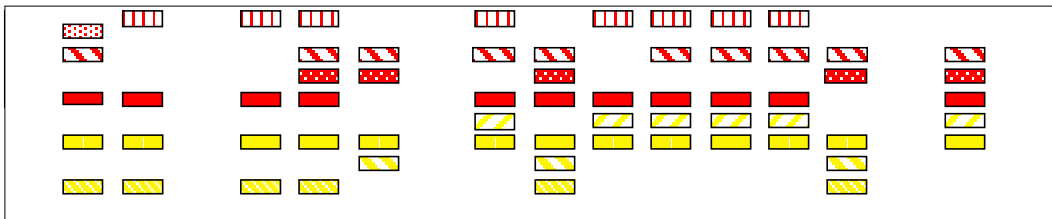

**Time (days)**

1

2

3

4

5

Supplement: MOESM1 [file 9548074]
